# Supplementary material for: Silicon Alters Leaf Surface Morphology and Suppresses Insect Herbivory in a Model Grass Species
Source: MDPI journal article supplement (doi:10.3390/plants9050643), 2020-05-19
Supplement: s1 [file s1]

**Table S1.** Effects of Si and damage level on *B. distachyon* relative electrolyte leakage. Generalized linear models P-values were calculated based on likelihood ratio tests using chi-squared test statistic. Significant values ( $P < 0.05$ ) are highlighted in bold.

| Relative Electrolyte Leakage | d.f. | $\chi^2$ | $p$               |
|------------------------------|------|----------|-------------------|
| Si                           | 1,48 | 0.02     | 0.88              |
| Damage                       | 2,48 | 159.14   | <b>&lt; 0.001</b> |
| Si x damage                  | 2,48 | 0.41     | 0.52              |

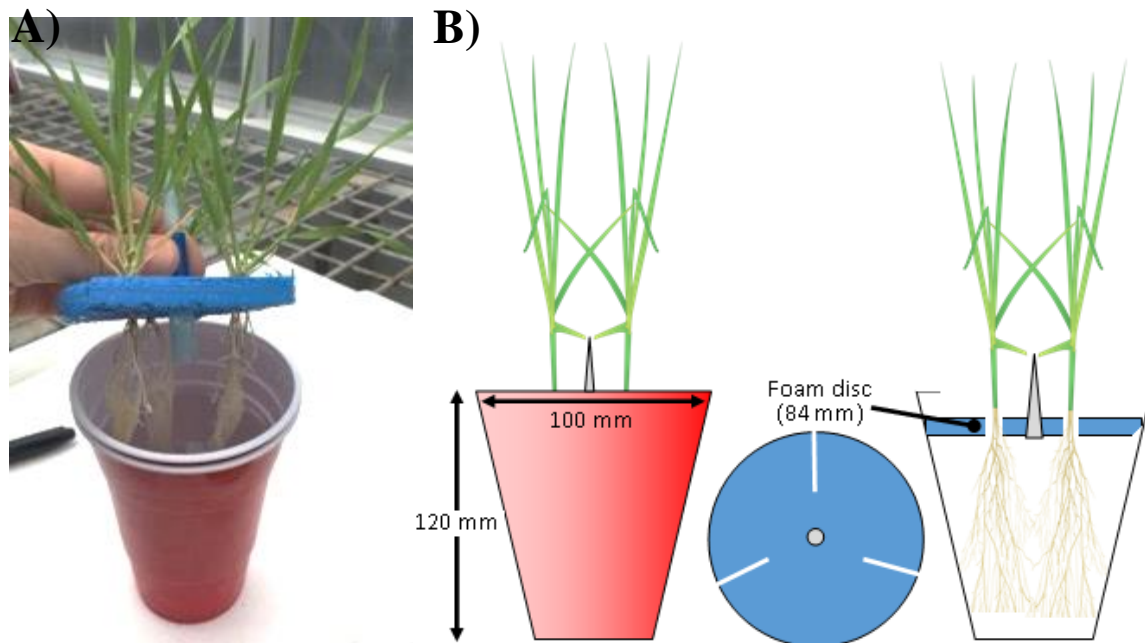

**Figure S1.** (A) a photograph showing the hydroponics system used and (B) the dimensions.
